# Supplementary figures and images for: Recovering cellulase and increasing glucose yield during lignocellulosic hydrolysis using lignin-MPEG with a sensitive pH response
Source: Royal Society of Chemistry journal article supplement (doi:10.1039/c8gc04059a), 2019-01-01

### Supporting information

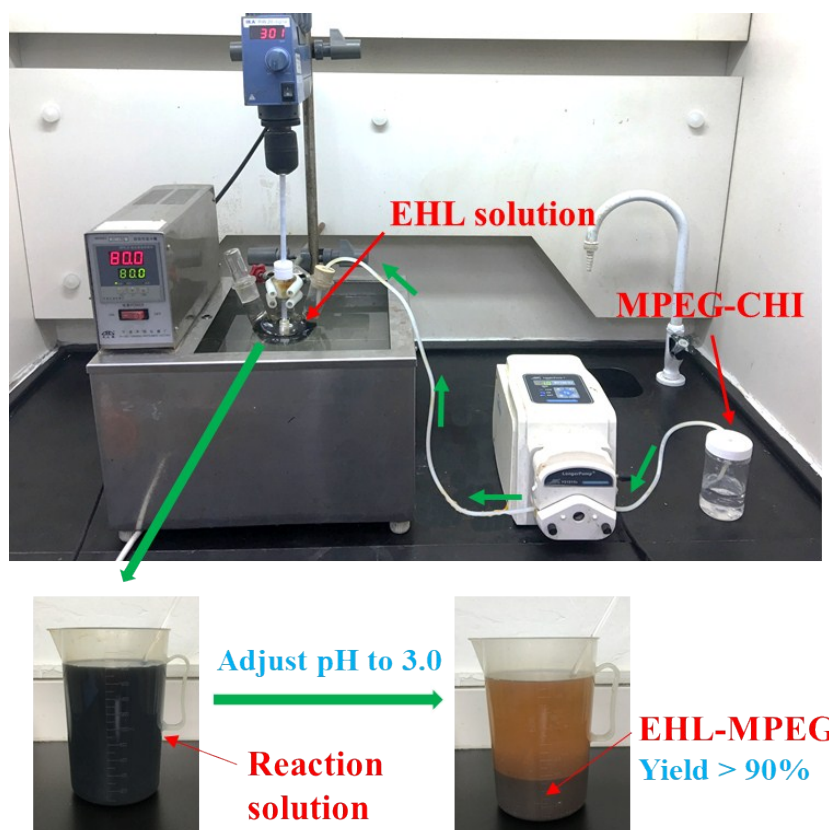

**Figure S1** The flow chart for the synthesis of EHL-MPEG.

Supplement: c8gc04059a1.pdf [file c8gc04059a1.pdf]
